# Supplementary material for: A human de novo mutation in MYH10 phenocopies the loss of function mutation in mice
Source: PubMed Central journal article supplement — Rare Dis. 2013 Aug 14;1:e26144. doi: 10.4161/rdis.26144 (PMC3927488; doi:10.4161/rdis.26144), 2013-08-14
Supplement: rdis-1-e26144-s01.pdf [file rdis-1-e26144-s01.pdf]

## Supplemental Material to:

Lea Tuzovic, Lan Yu, Wenqi Zeng, Xiang Li, Hong Lu, Hsiao-Mei Lu, Kelly Gonzalez, and Wendy K. Chung

A human de novo mutation in *MYH10* phenocopies the loss of function mutation in mice

Rare Diseases 2013; 1(3)

<http://dx.doi.org/10.4161/rdis.26144>

[http://www.landesbioscience.com/journals/rarediseases/  
article/26144/](http://www.landesbioscience.com/journals/rarediseases/article/26144/)

Supplementary tables:

Table S1: Bioinformatics Variant Filtering

| <b>Stepwise Filtering<sup>1</sup></b>                                 | <b>Proband</b> | <b>Father</b> | <b>Mother</b> | <b>Average</b> |
|-----------------------------------------------------------------------|----------------|---------------|---------------|----------------|
| No. of variants in coding regions <sup>2</sup>                        | 118,337        | 125,974       | 126,536       | <b>123,616</b> |
| No. post-removal of intergenic and 3'/5' UTR variants                 | 86,497         | 88,687        | 88,911        | <b>88,032</b>  |
| No. post-removal of non-splice-related intronic <sup>3</sup> variants | 22,380         | 23,255        | 23,483        | <b>23,039</b>  |
| No. post-removal of synonymous variants                               | 11,926         | 12,353        | 12,590        | <b>12,290</b>  |

<sup>1</sup>Stepwise filtering protects variants annotated within the Human Gene Mutation Database (HGMD) and/or the Online Mendelian Inheritance in Man (OMIM) databases.

<sup>2</sup>Variants refers to single nucleotide alterations, insertions, deletions, and indels with at least 10x base pair coverage.

<sup>3</sup>Intronic refers to >3 bp into the introns

Table S2: Variant Filtering based on the inheritance model and interpretation

|                                         | <b>Inheritance Model Filtering</b> | <b>Manual Review<sup>1</sup></b> | <b>Notable Candidate Genes<sup>‡</sup></b> |
|-----------------------------------------|------------------------------------|----------------------------------|--------------------------------------------|
| Autosomal Dominant Genes (Alterations)  | 4 (4)                              | 3 (3)                            | <b>1 (1)</b>                               |
| Autosomal Recessive Genes (Alterations) | 6 (10)                             | 4 (7)                            | <b>0 (0)</b>                               |
| X-linked Recessive Genes (Alterations)  | 5 (5)                              | 4 (4)                            | <b>1 (1)</b>                               |
| X-linked Dominant Genes (Alterations)   | 0 (0)                              | 0 (0)                            | <b>0 (0)</b>                               |
| Y-linked Genes (Alterations)            | 0 (0)                              | 0 (0)                            | <b>0 (0)</b>                               |
| <b>TOTAL GENES (Alterations)</b>        | <b>15 (19)</b>                     | <b>11 (14)</b>                   | <b>2 (2)</b>                               |

<sup>1</sup>Manual filtering involves the removal of genes unrelated to the patient's evaluated phenotype and alterations considered benign

<sup>2</sup>Notable Candidate Genes: Genes with disease phenotype association overlapping that of the proband

Table S3: Summary of the variants remaining after manual filtering

| Gene Symbol/<br>Model             | Novel/<br>Characterized<br>Gene | Variant                           | Genotype |        |        | SIFT      | dbSNP       | Allele Frequency |                 |
|-----------------------------------|---------------------------------|-----------------------------------|----------|--------|--------|-----------|-------------|------------------|-----------------|
|                                   |                                 |                                   | Proband  | Father | Mother |           |             | ESP              | 1000<br>Genomes |
| <b><u>Autosomal Dominant</u></b>  |                                 |                                   |          |        |        |           |             |                  |                 |
| <i>MYH10</i>                      | Novel                           | c.2722G>T (p.E908X)               | +/-      | -/-    | -/-    |           | N/A         |                  |                 |
| <i>PLCB3</i>                      | Novel                           | c.703G>C (p.A235P)                | +/-      | -/-    | -/-    | tolerated | N/A         | N/A              | N/A             |
| <i>ZNF705G</i>                    | Novel                           | c.530G>A (p.C177Y)                | +/-      | -/-    | -/-    | damaging  | N/A         | N/A              | 0.05%           |
| <b><u>Autosomal Recessive</u></b> |                                 |                                   |          |        |        |           |             |                  |                 |
| <i>CRIPAK</i>                     | Novel                           | c.755_756insCA (p.L252PfsX178)    | +/-      | -/-    | -/-    |           |             |                  |                 |
|                                   |                                 | c.937_938insCG (p.S313RfsX117)    | +/-      | -/-    | -/-    |           |             |                  |                 |
| <i>KLHDC7A</i>                    | Novel                           | c.46C>A (p.Q16K)                  | +/-      | -/-    | +/-    | damaging  | rs140809384 | 0.17%            | 0.09%           |
|                                   |                                 | c.493C>T (p.P165S)                | +/-      | +/-    | -/-    | tolerated | N/A         | N/A              | N/A             |
| <i>PLCB3</i>                      | Novel                           | c.703G>C (p.A235P)                | +/-      | -/-    | -/-    | tolerated | N/A         | N/A              | N/A             |
|                                   |                                 | c.1301G>A (p.G434E)               | +/-      | +/-    | -/-    | damaging  | N/A         | N/A              | N/A             |
| <i>EPST11</i>                     | Novel                           | c.1184_1185insCCTGA (p.E395AfsX2) | +/+      | +/-    | +/-    |           | rs111313375 |                  |                 |
| <b><u>X-linked recessive</u></b>  |                                 |                                   |          |        |        |           |             |                  |                 |
| <i>DOCK11</i>                     | Novel                           | c.5315C>T p.S1772F                | +/+      | -/-    | +/-    | tolerated | N/A         | N/A              | N/A             |
| <i>ODZ1</i>                       | Novel                           | c.5093G>A p.R1698H                | +/+      | -/-    | +/-    | tolerated | rs140984539 | 0.03%            | 0.14%           |
| <i>ZNF630</i>                     | Novel                           | c.568G>T p.D190Y                  | +/+      | -/-    | +/-    | damaging  | N/A         | N/A              | N/A             |
| <i>BCOR</i>                       | Characterized                   | c.626C>T p.S209L                  | +/+      | -/-    | +/-    | tolerated | rs143697110 | 0.06%            | N/A             |

N/A = not available; blank boxes indicate not applicable
